# Supplementary material for: Short-Course High-Intensity Statin Treatment during Admission for Myocardial Infarction and LDL-Cholesterol Reduction—Impact on Tailored Lipid-Lowering Therapy at Discharge
Source: MDPI journal article supplement (doi:10.3390/jcm13010127), 2023-12-25
Supplement: s1 [file s1]

# Short-Course High-Intensity Statin Treatment during Admission for Myocardial Infarction and LDL-Cholesterol Reduction—Impact on Tailored Lipid-Lowering Therapy at Discharge

Víctor Marcos-Garcés <sup>1,2,\*</sup>, Héctor Merenciano-González <sup>1,2</sup>, María Luz Martínez Mas <sup>1</sup>, Patricia Palau <sup>1,2,3</sup>, Josefa Inés Climent Alberola <sup>4</sup>, Nerea Perez <sup>2</sup>, Laura López-Bueno <sup>4</sup>, María Concepción Esteban Argente <sup>4</sup>, María Valls Reig <sup>1</sup>, Raquel Muñoz Alcover <sup>1</sup>, Inmaculada Pradillas Contreras <sup>1</sup>, Ana Arizón Benito <sup>5</sup>, Alfonso Payá Rubio <sup>4</sup>, César Ríos-Navarro <sup>2</sup>, Elena de Dios <sup>6</sup>, Jose Gava <sup>7</sup>, Francisco Javier Chorro <sup>1,2,3,6</sup>, Juan Sanchis <sup>1,2,3,6</sup> and Vicente Bodi <sup>1,2,3,6,\*</sup>

<sup>1</sup> Department of Cardiology, Hospital Clinico Universitario de Valencia, 46010 Valencia, Spain; hectormeren@gmail.com (H.M.-G.); mluzmmas@comv.es (M.L.M.M.); patricia.palau@uv.es (P.P.); mvallsr@gmail.com (M.V.R.); raquelalcover@hotmail.com (R.M.A.); inmapracon@yahoo.es (I.P.C.); francisco.j.chorro@uv.es (F.J.C.); sanchis\_juafor@gva.es (J.S.)

<sup>2</sup> INCLIVA Health Research Institute, 46010 Valencia, Spain; neere\_8@hotmail.com (N.P.); cesar.rios@uv.es (C.R.-N.)

<sup>3</sup> Department of Medicine, Faculty of Medicine and Odontology, University of Valencia, 46010 Valencia, Spain

<sup>4</sup> Department of Rehabilitation, Hospital Clinico Universitario de Valencia, 46010 Valencia, Spain; inescliment093@gmail.com (J.I.C.A.); laura.lopez@uv.es (L.L.-B.); lulilloluli@yahoo.es (M.C.E.A.); paya\_alf@gva.es (A.P.R.)

<sup>5</sup> Hospital Clinico Universitario de Valencia, 46010 Valencia, Spain; arizon\_anaben@gva.es

<sup>6</sup> Network Biomedical Research Center for Cardiovascular Diseases (CIBER-CV), 28029 Madrid, Spain; elenaddll@gmail.com

<sup>7</sup> Centre for Biomaterials and Tissue Engineering, Universitat Politècnica de València, 46022 Valencia, Spain; jose\_4\_6\_90@hotmail.com

\* Correspondence: marcos\_vic@gva.es (V.M.-G.); vicente.bodi@uv.es (V.B.)

## 1. Supplementary Tables

Table S1. Estimated percentage of LDL-C reduction according to LLT.

| LLT                    | % reduction in mono-therapy | % reduction in combination with ezetimibe 10mg o.d. |
|------------------------|-----------------------------|-----------------------------------------------------|
| Rosuvastatin 5mg o.d.  | 40                          | 54                                                  |
| Rosuvastatin 10mg o.d. | 46                          | 58                                                  |
| Rosuvastatin 20mg o.d. | 51                          | 62                                                  |
| Rosuvastatin 30mg o.d. | 54                          | 65                                                  |
| Rosuvastatin 40mg o.d. | 56                          | 66                                                  |
| Atorvastatin 10mg o.d. | 37                          | 51                                                  |
| Atorvastatin 20mg o.d. | 43                          | 56                                                  |
| Atorvastatin 30mg o.d. | 46                          | 58                                                  |
| Atorvastatin 40mg o.d. | 49                          | 61                                                  |
| Atorvastatin 80mg o.d. | 55                          | 65                                                  |
| Simvastatin 5mg o.d.   | 24                          | 41                                                  |
| Simvastatin 10mg o.d.  | 28                          | 45                                                  |
| Simvastatin 20mg o.d.  | 33                          | 48                                                  |

---

|                              |                |                |
|------------------------------|----------------|----------------|
| <b>Simvastatin 40mg o.d.</b> | 39             | 53             |
| <b>Simvastatin 80mg o.d.</b> | 44             | 57             |
| <b>Pravastatin 10mg o.d.</b> | 20             | 38             |
| <b>Pravastatin 20mg o.d.</b> | 26             | 43             |
| <b>Pravastatin 40mg o.d.</b> | 29             | 45             |
| <b>Pravastatin 80mg o.d.</b> | 35             | 50             |
| <b>Pitavastatin 1mg o.d.</b> | 32             | 48             |
| <b>Pitavastatin 2mg o.d.</b> | 36             | 51             |
| <b>Pitavastatin 4mg o.d.</b> | 43             | 56             |
| <b>Fluvastatin 20mg o.d.</b> | 20             | 38             |
| <b>Fluvastatin 40mg o.d.</b> | 24             | 41             |
| <b>Fluvastatin 80mg o.d.</b> | 34             | 49             |
| <b>Lovastatin 10mg o.d.</b>  | 20             | 38             |
| <b>Lovastatin 20mg o.d.</b>  | 28             | 45             |
| <b>Lovastatin 40mg o.d.</b>  | 31             | 47             |
| <b>Lovastatin 80mg o.d.</b>  | 40             | 54             |
| <b>Ezetimibe 10mg o.d.</b>   | 23             | -              |
| <b>Evolocumab 140mg o.d.</b> | +61% reduction | +70% reduction |
| <b>Alirocumab 75mg o.d.</b>  | +53% reduction | +64% reduction |
| <b>Alirocumab 150mg o.d.</b> | +62% reduction | +71% reduction |

Abbreviations: LDL-C = low-density lipoprotein cholesterol. LLT = lipid-lowering therapy.
